# Supplementary material for: Evidence That Regulation of Pri-miRNA/miRNA Expression Is Not a General Rule of miPEPs Function in Humans
Source: PubMed Central journal article supplement (PMC8038077; doi:10.3390/ijms22073432), 2021-03-26
Supplement: ijms-22-03432-s001.pdf [file ijms-22-03432-s001.pdf]

a

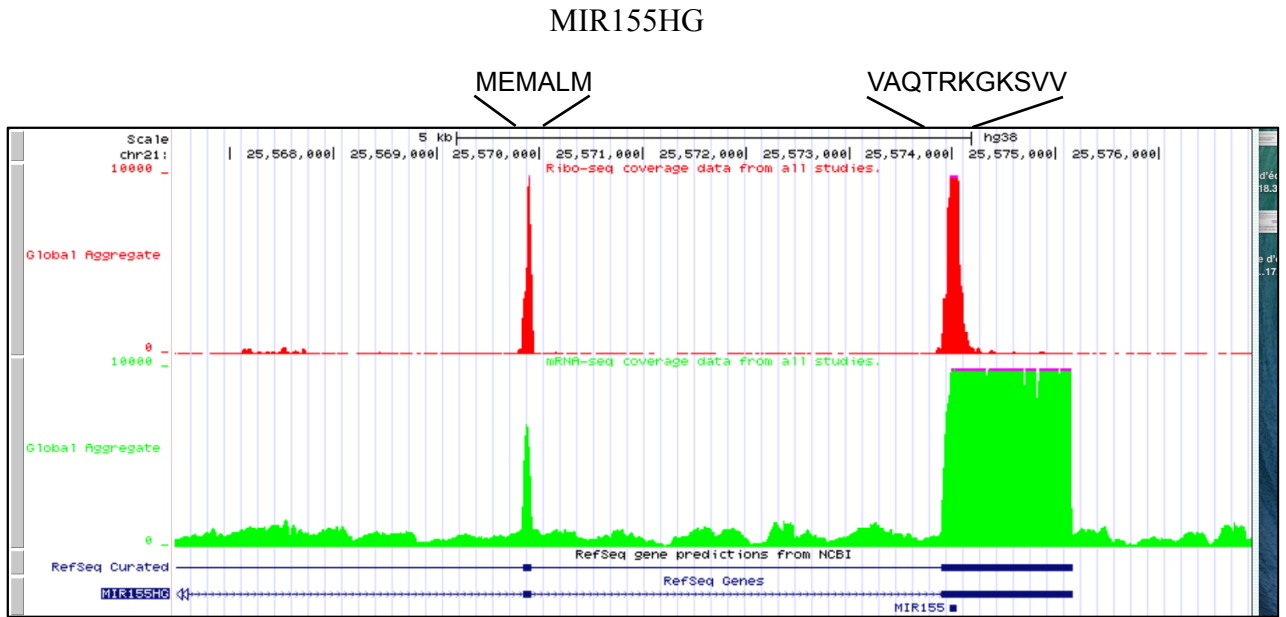

b

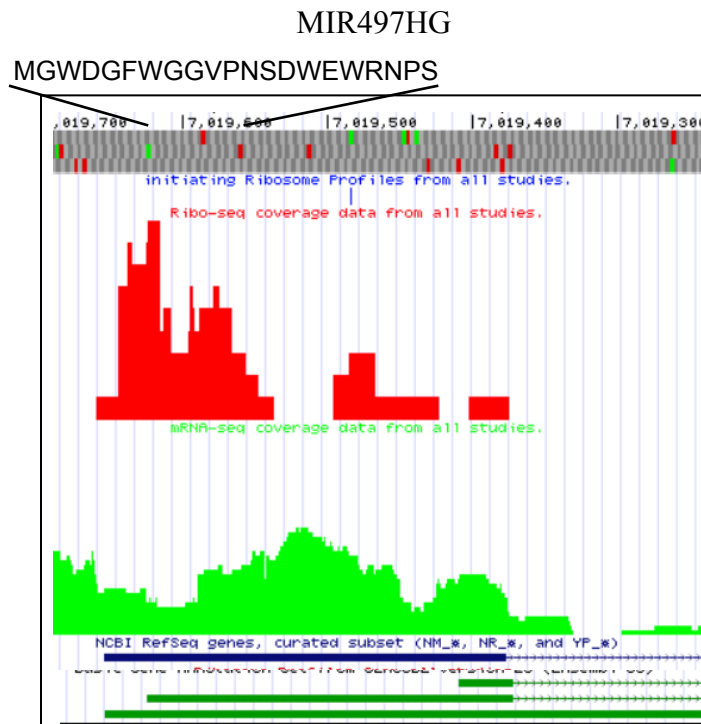

### Figure S1: Identification of ribosome profiling marks within M155HG and MIR497HG

Ribosome profiling (red) and mRNA-seq coverage (green) for MIR155HG (a) and the 5' part of MIR497HG (b) with the sequences of the miPEPs indicated.

Analysis was done using the GWIPS-viz browser (<http://gwips.ucc.ie>) [15]

Supplementary Figure 2

**miPEP155**

|            |                    |
|------------|--------------------|
| Human      | MEMALMVAQTRKGKSVV* |
| Chimpanzee | MEMALMVAQTRKGKSVV* |
| Gorilla    | MEMALMVAQTRKGKSVV* |
| Orangutan  | MEMAVMVAQTRKGKSVV* |
| Macaque    | MEMALMVAQTRKGKSVV* |
| Baboon     | MEMALMVAQTRKGKSVV* |
| Marmoset   | KEMALRVAQTRKGKSVV* |
| Tarsier    | KEMLLMVAQTNKEKSVV* |
| Mouse      | EELVLMVLQTRKGKCVV* |

**miPEP497**

|            |                           |
|------------|---------------------------|
| Human      | MGWDGFWGGVPNSDWEWRNPS*    |
| Chimpanzee | MGWDGFWGGVPNSDWEWRNPS*    |
| Gorilla    | MGWDGFWGGVPNSDWEWRNPS*    |
| Orangutan  | MGWDGFWGGVPNSDWEWRNPS*    |
| Macaque    | MGWDGFWGGVPNSDWEWRNPS*    |
| Baboon     | MGWDGFWGGVPNSDWEWRNPS*    |
| Marmoset   | MGWDGFWGGVPNSDWEWRNPS*    |
| Tarsier    | MGWDGFWGGVPNSDWEWRNPS*    |
| Mouse      | MGWDGFWGGVPNSDWEWRNPSR... |

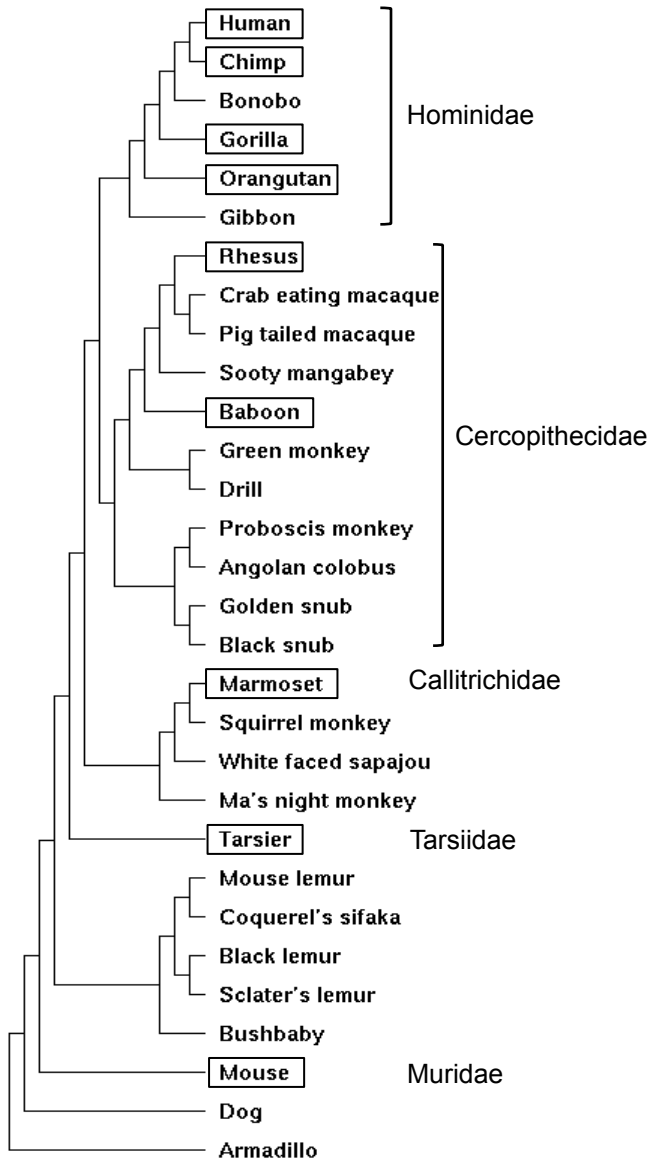

**Figure S2: Alignment of the miPEP155 and miPEP497 peptidic sequences in primates and mouse.**

The right panel shows the phylogenetic tree of the species analyzed

Supplementary Figure 3

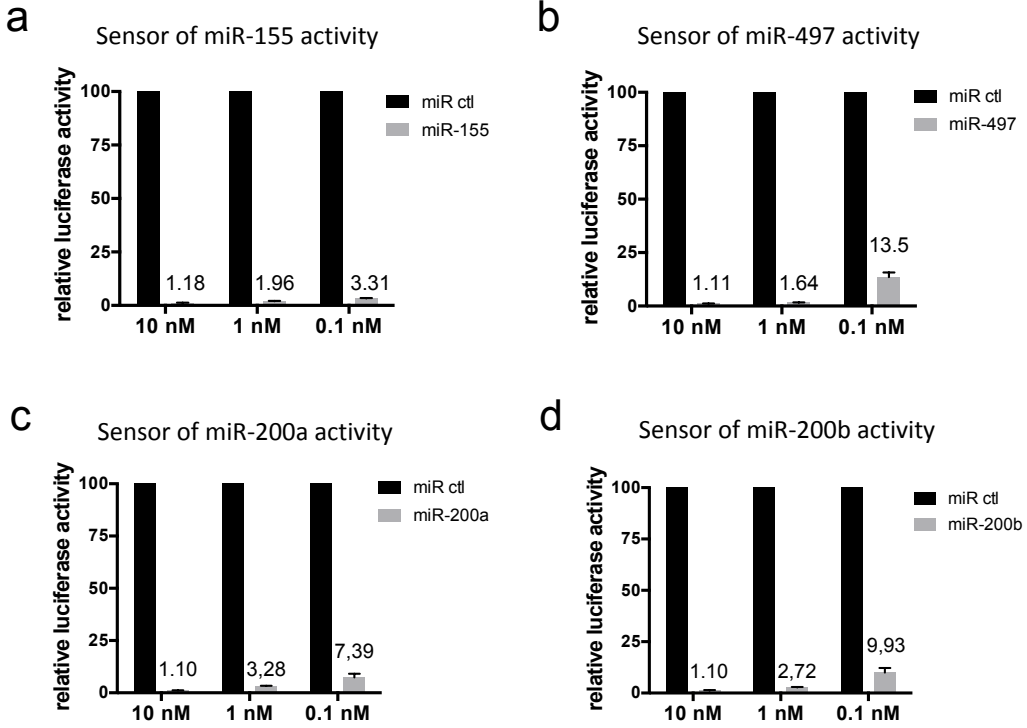

**Figure S3: Validation and sensitivity of the luciferase sensors of miR activity.**

Hela (a, b) or PC3 (c, d) cells were cotransfected with the luciferase sensors of miR activity together with decreasing amounts of miR control (ctl) or miR. Transfected cells were harvested 48 h post-transfection for dual luciferase assays. The relative luciferase activities of miR transfected cells were compared to that of the miR ctl transfected cells, set to 100. Graphs show means of three independent experiments.

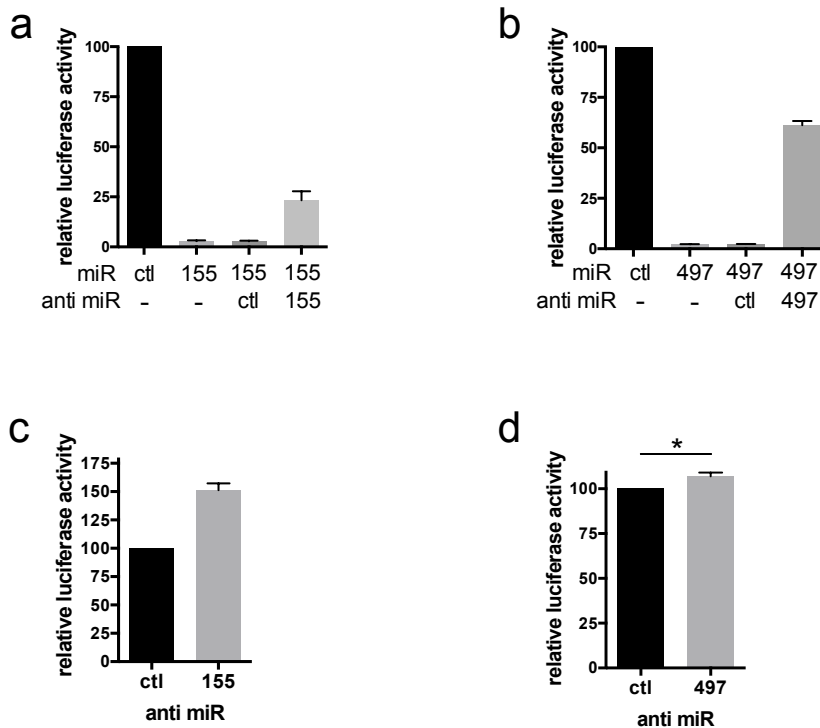

#### Figure S4: Validation of anti-miRNAs and HeLa cells to study miR-155 and miR-497

**(a, b)** Anti miRNAs rescue miRNAs overexpression. HeLa cells were cotransfected with miR control (ctl), miR-155 **(a)** or miR-497 (1 nM) **(b)**, with or without anti miR ctl, anti miR-155 **(a)** or anti miR-497 (10 nM) **(b)**.

**(c, d)** HeLa cells were transfected with anti miR ctl (10 nM) **(c)**, anti miR-155 (10 nM) or anti miR-497 (10 nM) **(d)**. Transfected cells were harvested 48 h post-transfection for dual luciferase assays. The relative luciferase activities of miR or anti-miR transfected cells were compared to that of the miR ctl or anti miR ctl transfected cells, set to 100. Graphs show means  $\pm$  SEM of three **(a, b, c)** or five **(d)** independent experiments; \*  $p < 0.05$ .

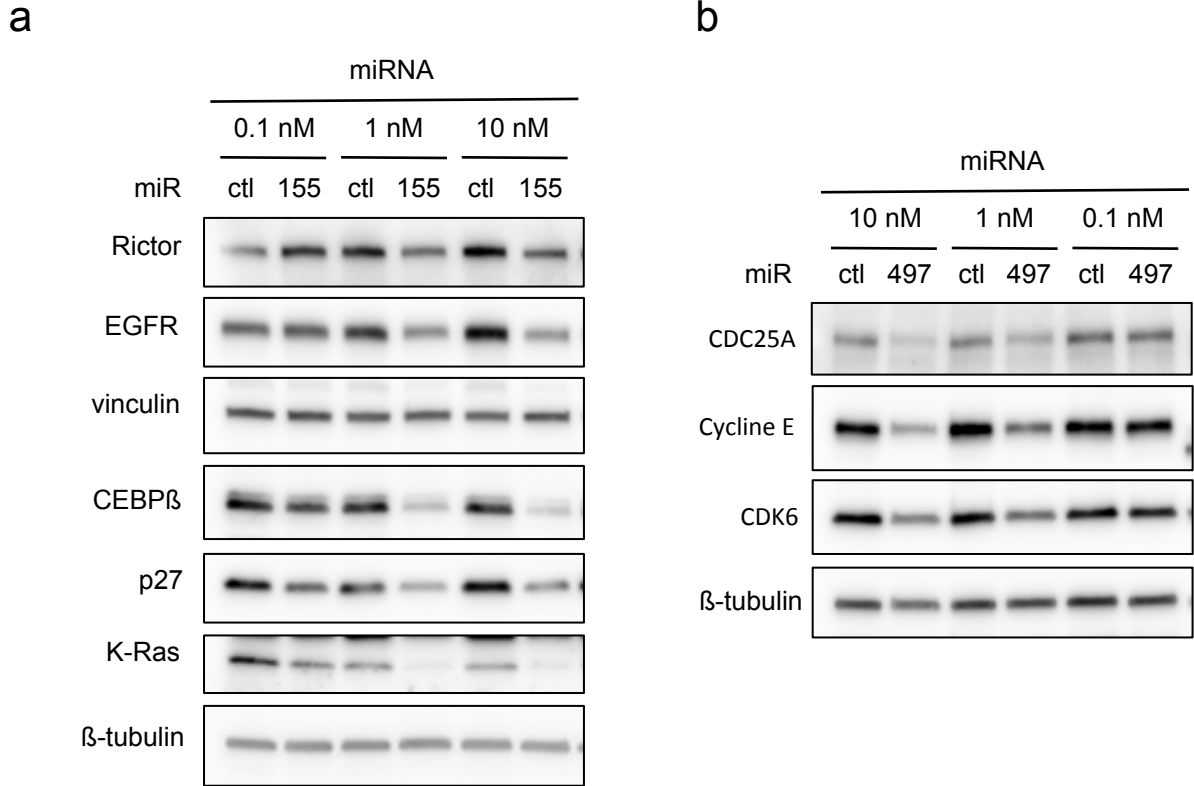

**Figure S5: Expression of miR-155 and miR-497 target genes upon overexpression of miR-155 and miR-497**

Hela cells were transfected with increasing amounts of miR control (ctl), miR-155 (**a**) or miR-497 (**b**) and 48 h later subjected to immunoblot analyses using the indicated antibodies. Vinculin and β-tubulin were used as loading control.

**Table S1**

List of lnc MIRNA Host Genes and their encoded-miRNAs containing sORFs exhibiting ribosome profiling marks after analyses with the GWIPS-viz genome browser (<http://gwips.ucc.ie>) [15]. The MIR Host genes for which a miPEP was co-detected by mass spectrometry (Table S2) are listed in bold.

| encode id              | MIR Host gene      | MIR hosted                                |
|------------------------|--------------------|-------------------------------------------|
| <b>ENSG00000255248</b> | <b>MIR100HG</b>    | <b>MIR-100-LET-7a-2 cluster MIR125B-1</b> |
| <b>ENSG00000254377</b> | <b>MIR124-2HG</b>  | <b>MIR124-2</b>                           |
| ENSG00000225206        | MIR137HG           | MIR137 MIR2682                            |
| ENSG00000234883        | MIR155HG           | MIR155                                    |
| ENSG00000215417        | MIR17HG            | MIR17-92 cluster                          |
| <b>ENSG00000229989</b> | <b>MIR181A1HG</b>  | <b>MIR181A1 MIR181B1</b>                  |
| ENSG00000224020        | MIR181A2HG         | MIR181A2 MIR181B2                         |
| <b>ENSG00000262454</b> | <b>MIR193BHG</b>   | <b>MIR193B MIR365A</b>                    |
| <b>ENSG00000229719</b> | <b>MIR194-2HG</b>  | <b>MIR194-2 MIR192</b>                    |
| ENSG00000186594        | MIR22HG            | MIR22                                     |
| ENSG00000282810        | MIR210HG           | MIR210                                    |
| <b>ENSG00000254349</b> | <b>MIR2052HG</b>   | <b>MIR2052</b>                            |
| <b>ENSG00000253522</b> | <b>MIR3142HG</b>   | <b>MIR3142 MIR146A</b>                    |
| ENSG00000171889        | MIR31HG            | MIR31                                     |
| <b>ENSG00000280870</b> | <b>MIR325HG</b>    | <b>MIR325 MIR384</b>                      |
| <b>ENSG00000228526</b> | <b>MIR34AHG</b>    | <b>MIR34A</b>                             |
| ENSG00000224184        | MIR3681HG          | MIR3681                                   |
| ENSG00000251230        | MIR3945HG          | MIR3945                                   |
| <b>ENSG00000172965</b> | <b>MIR4435-2HG</b> | <b>MIR4435-2</b>                          |
| ENSG00000247516        | MIR4458HG          | MIR4458                                   |
| ENSG00000228824        | MIR4500HG          | MIR4500                                   |
| <b>ENSG00000267532</b> | <b>MIR497HG</b>    | <b>MIR497 MIR195</b>                      |
| ENSG00000223749        | MIR503HG           | MIR503                                    |
| ENSG00000224141        | MIR548XHG          | MIR548X                                   |
| ENSG00000229401        | MIR5689HG          | MIR5689                                   |
| <b>ENSG00000228340</b> | <b>MIR646HG</b>    | <b>MIR646</b>                             |
| ENSG00000176840        | MIR7-3HG           | MIR7-3                                    |
| ENSG00000260083        | MIR762HG           | MIR762                                    |
| ENSG00000255571        | MIR9-3HG           | MIR9-3                                    |
| ENSG00000267374        | MIR924HG           | MIR5583-1 MIR5583-2 MIR924                |
| <b>ENSG00000215386</b> | <b>MIR99AHG</b>    | <b>MIR99A MIRLET7C MIR125B2</b>           |
| <b>ENSG00000197182</b> | <b>MIRLET7BHG</b>  | <b>MIR3619 MIRLET7A3 MIR4763 MIRLET7B</b> |

**Table S2**

List of lnc MIRNA Host Genes and their encoded-miRNAs containing sORFs-encoded peptides/proteins with experimental evidence obtained from mass spectrometry ([www.openprot.org](http://www.openprot.org)) [26]. The MIR Host genes for which a miPEP was co-detected in Riboprofiling experiments (Table S1). are listed in bold

| encode id              | MIR Host gene      | MIR hosted                                |
|------------------------|--------------------|-------------------------------------------|
| <b>ENSG00000255248</b> | <b>MIR100HG</b>    | <b>MIR-100-LET-7a-2 cluster MIR125B-1</b> |
| <b>ENSG00000254377</b> | <b>MIR124-2HG</b>  | <b>MIR124-2</b>                           |
| ENSG00000265142        | MIR133A1HG         | MIR1-2 MIR133A1                           |
| <b>ENSG00000229989</b> | <b>MIR181A1HG</b>  | <b>MIR181A1 MIR181B1</b>                  |
| <b>ENSG00000262454</b> | <b>MIR193BHG</b>   | <b>MIR193B MIR365A</b>                    |
| <b>ENSG00000229719</b> | <b>MIR194-2HG</b>  | <b>MIR194-2 MIR192</b>                    |
| <b>ENSG00000254349</b> | <b>MIR2052HG</b>   | <b>MIR2052</b>                            |
| ENSG00000226702        | MIR217HG           | MIR216B, 216A, 217                        |
| <b>ENSG00000253522</b> | <b>MIR3142HG</b>   | <b>MIR3142 MIR146A</b>                    |
| <b>ENSG00000280870</b> | <b>MIR325HG</b>    | <b>MIR325 MIR384</b>                      |
| <b>ENSG00000228526</b> | <b>MIR34AHG</b>    | <b>MIR34A</b>                             |
| ENSG00000245832        | MIR4300HG          | MIR4300                                   |
| <b>ENSG00000172965</b> | <b>MIR4435-2HG</b> | <b>MIR4435-2</b>                          |
| ENSG00000280237        | MIR4697HG          | MIR4697                                   |
| <b>ENSG00000267532</b> | <b>MIR497HG</b>    | <b>MIR497 MIR195</b>                      |
| ENSG00000236901        | MIR600HG           | MIR600                                    |
| <b>ENSG00000228340</b> | <b>MIR646HG</b>    | <b>MIR646</b>                             |
| ENSG00000227195        | MIR663AHG          | MIR663A                                   |
| ENSG00000236172        | MIR7515HG          | MIR1515                                   |
| <b>ENSG00000215386</b> | <b>MIR99AHG</b>    | <b>MIR99A MIRLET7C MIR125B2</b>           |
| ENSG00000197182        | MIRLET7BHG         | MIR3619 MIRLET7A3 MIR4763 MIRLET7B        |
| <b>ENSG00000230262</b> | <b>MIRLET7DHG</b>  | <b>MIRLET7D</b>                           |
